# Supplementary material for: Exome Sequencing Identifies Rare Deleterious Mutations in DNA Repair Genes FANCC and BLM as Potential Breast Cancer Susceptibility Alleles
Source: PubMed Central journal article supplement (PMC3459953; doi:10.1371/journal.pgen.1002894), 2012-09-27

Family 4 (*PTEN*)

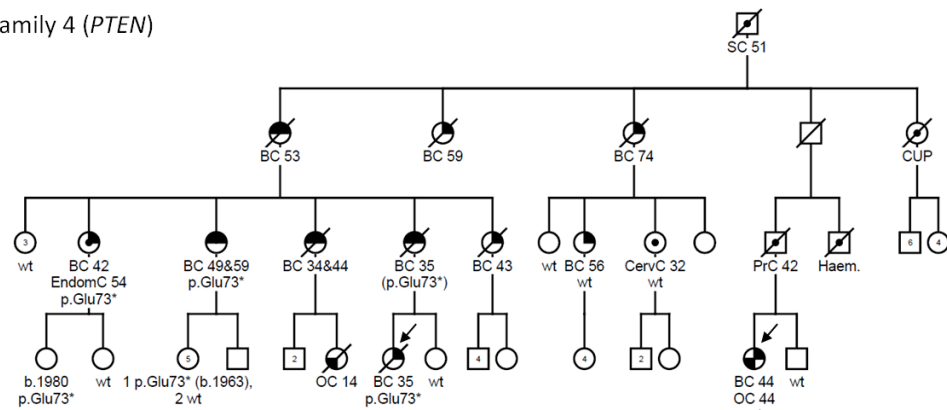

Family 6 (*BRCA2*)

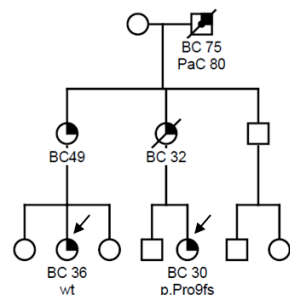

Family 5 (*BRCA2*)

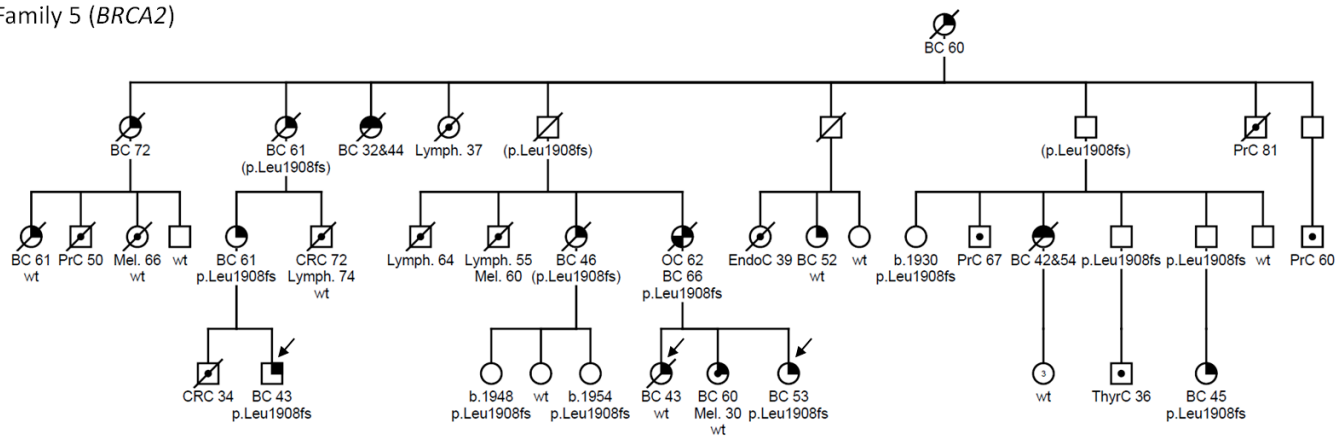

Supplement: pgen.1002894.s001.pdf [file pgen.1002894.s001.pdf]
